# Supplementary material
Source: PubMed Central journal article supplement (PMC7245350)
Supplement: DC192187SupplementaryData.pdf [file DC192187SupplementaryData.pdf]

SUPPLEMENTARY DATA

**Supplementary Table 1. Key baseline measures**

Supplementary table 1. Key baseline measures

SU

| <b>Parameter</b>              | <b>Overall<br/>(n=56)</b> | <b>Dapagliflozin<br/>(n=28)</b> | <b>Placebo<br/>(n=28)</b> | <b>p value</b> |
|-------------------------------|---------------------------|---------------------------------|---------------------------|----------------|
|                               | <b>Mean (SD)</b>          | <b>Mean (SD)</b>                | <b>Mean (SD)</b>          |                |
| <b>Age (years)</b>            | <b>67.1 (6.9)</b>         | <b>66.9 (7.0)</b>               | <b>67.4 (6.8)</b>         | <b>0.788</b>   |
| <b>Male gender</b>            | <b>37 (66.1%)</b>         | <b>18 (64.3%)</b>               | <b>19 (67.9%)</b>         | <b>0.054</b>   |
| <b>Weight (kg)</b>            | <b>91.5 (18.6)</b>        | <b>92.9 (18.1)</b>              | <b>90.2 (19.3)</b>        | <b>0.587</b>   |
| <b>BMI (kg/m<sup>2</sup>)</b> | <b>32.5 (5.3)</b>         | <b>33.0 (5.5)</b>               | <b>32 (5.2)</b>           | <b>0.495</b>   |
| <b>Functional Class:</b>      |                           |                                 |                           |                |
| <b>NYHA I</b>                 | <b>25 (44.6%)</b>         | <b>12 (42.9%)</b>               | <b>13 (46.4%)</b>         | <b>0.794</b>   |
| <b>NYHA II</b>                | <b>24 (42.9%)</b>         | <b>13 (46.4%)</b>               | <b>11 (39.3%)</b>         | <b>0.546</b>   |
| <b>NYHA III</b>               | <b>7 (12.5%)</b>          | <b>3 (10.7%)</b>                | <b>4 (14.3%)</b>          | <b>0.245</b>   |
| <b>Blood pressure /</b>       |                           |                                 |                           |                |
| <b>Heart Rate:</b>            |                           |                                 |                           |                |
| <b>SBP (mmHg)</b>             | <b>133.9 (17.1)</b>       | <b>135 (15.4)</b>               | <b>132.8 (18.8)</b>       | <b>0.627</b>   |
| <b>DBP (mmHg)</b>             | <b>72.7 (10.0)</b>        | <b>74 (7.1)</b>                 | <b>71.4 (12.2)</b>        | <b>0.328</b>   |
| <b>MAP (mmHg)</b>             | <b>93.1 (10.4)</b>        | <b>94.4 (7.3)</b>               | <b>91.9 (12.8)</b>        | <b>0.373</b>   |
| <b>HR (bpm)</b>               | <b>76.0 (12.8)</b>        | <b>77.6 (14.0)</b>              | <b>74.4 (11.6)</b>        | <b>0.354</b>   |
| <b>Etiology of heart</b>      |                           |                                 |                           |                |
| <b>failure:</b>               |                           |                                 |                           |                |
| <b>IHD</b>                    | <b>30 (53.6%)</b>         | <b>15 (53.6%)</b>               | <b>15 (53.6%)</b>         | <b>0.845</b>   |
| <b>DCM</b>                    | <b>13 (23.2%)</b>         | <b>7 (25.0%)</b>                | <b>6 (21.4%)</b>          | <b>0.456</b>   |
| <b>Other</b>                  | <b>11 (19.6%)</b>         | <b>5 (17.9%)</b>                | <b>6 (21.4%)</b>          | <b>0.124</b>   |
| <b>Unknown</b>                | <b>2 (3.6%)</b>           | <b>1 (3.6%)</b>                 | <b>1 (3.6%)</b>           | <b>1</b>       |

SUPPLEMENTARY DATA

|                                 |                     |                    |                     |              |
|---------------------------------|---------------------|--------------------|---------------------|--------------|
| <b>Duration of disease:</b>     |                     |                    |                     |              |
| <b>Heart failure (years)</b>    | <b>6.24 (6.49)</b>  | <b>6.64 (6.1)</b>  | <b>5.83 (6.99)</b>  | <b>0.649</b> |
| <b>Type 2 diabetes (years)</b>  | <b>8.77 (6.26)</b>  | <b>8.41 (6.5)</b>  | <b>9.14 (6.17)</b>  | <b>0.672</b> |
| <b>Co-morbidities:</b>          |                     |                    |                     |              |
| <b>Hypertension</b>             | <b>40 (71.4%)</b>   | <b>22 (78.6%)</b>  | <b>18 (64.3%)</b>   | <b>0.485</b> |
| <b>AF</b>                       | <b>22 (39.3%)</b>   | <b>11 (39.3%)</b>  | <b>11 (39.3%)</b>   | <b>0.998</b> |
| <b>PAD</b>                      | <b>9 (16.1%)</b>    | <b>5 (17.9%)</b>   | <b>4 (14.3%)</b>    | <b>0.842</b> |
| <b>Stroke / TIA</b>             | <b>10 (17.9%)</b>   | <b>3 (10.7%)</b>   | <b>7 (25.0%)</b>    | <b>0.06</b>  |
| <b>MI</b>                       | <b>29 (51.8%)</b>   | <b>14 (50.0%)</b>  | <b>15 (53.6%)</b>   | <b>0.475</b> |
| <b>Medications:</b>             |                     |                    |                     |              |
| <b>Loop diuretic dose (mg)*</b> | <b>49.8 (22.0)</b>  | <b>52.9 (20.5)</b> | <b>46.8 (23.4)</b>  | <b>0.307</b> |
| <b>ACE-I/ARB</b>                | <b>50 (89.3%)</b>   | <b>25 (89.3%)</b>  | <b>25 (89.3%)</b>   | <b>0.985</b> |
| <b>Beta blockers</b>            | <b>46 (82.1%)</b>   | <b>24 (85.7%)</b>  | <b>22 (78.6%)</b>   | <b>0.877</b> |
| <b>MRA</b>                      | <b>23 (41.1%)</b>   | <b>13 (46.4%)</b>  | <b>10 (35.7%)</b>   | <b>0.898</b> |
| <b>Metformin</b>                | <b>31 (55.4%)</b>   | <b>17 (60.7%)</b>  | <b>14 (50.0%)</b>   | <b>0.978</b> |
| <b>Other OHA</b>                | <b>22 (39.3%)</b>   | <b>13 (46.4%)</b>  | <b>9 (32.1%)</b>    | <b>0.413</b> |
| <b>Insulin</b>                  | <b>16 (28.6%)</b>   | <b>6 (21.4%)</b>   | <b>10 (35.7%)</b>   | <b>0.657</b> |
| <b>Cardiac MRI Parameters:</b>  |                     |                    |                     |              |
| <b>LVESV† (ml)</b>              | <b>102.7 (50.5)</b> | <b>99.2 (40.7)</b> | <b>106.4 (59.6)</b> | <b>0.604</b> |

SUPPLEMENTARY DATA

|                                                        |                     |                     |                     |              |
|--------------------------------------------------------|---------------------|---------------------|---------------------|--------------|
| <b>Indexed LVESV†</b><br>(ml/m <sup>2</sup> )          | <b>51.6 (26.2)</b>  | <b>49.4 (21.3)</b>  | <b>54.1 (30.9)</b>  | <b>0.52</b>  |
| <b>LVEDV † (ml)</b>                                    | <b>180.2 (61.0)</b> | <b>172.4 (47.7)</b> | <b>188.3 (72.4)</b> | <b>0.346</b> |
| <b>Indexed LVEDV†</b><br>(ml/m <sup>2</sup> )          | <b>90.3 (30.9)</b>  | <b>85.9 (24.1)</b>  | <b>95.0 (36.8)</b>  | <b>0.294</b> |
| <b>LVEF† (%)</b>                                       | <b>45.5 (12.0)</b>  | <b>44.5 (12.4)</b>  | <b>46.5 (11.7)</b>  | <b>0.526</b> |
| <b>LV Mass Index†</b><br>(g/m <sup>2</sup> )           | <b>71.5 (17.7)</b>  | <b>69.5 (16.3)</b>  | <b>73.7 (19.3)</b>  | <b>0.398</b> |
| <b>LV Stroke Vol†</b><br>(ml)                          | <b>38.7 (10.4)</b>  | <b>36.6 (10.4)</b>  | <b>41 (10.2)</b>    | <b>0.126</b> |
| <b>Indexed LA</b><br><b>Volume††(ml/m<sup>2</sup>)</b> | <b>50.0 (18.9)</b>  | <b>49.0 (18.8)</b>  | <b>51 (19.3)</b>    | <b>0.699</b> |
| <b>Biochemistry:</b>                                   |                     |                     |                     |              |
| <b>Hb (g/dL)</b>                                       | <b>13.5 (1.6)</b>   | <b>13.2 (1.3)</b>   | <b>13.8 (1.5)</b>   | <b>0.294</b> |
| <b>Hct (%)</b>                                         | <b>40.9 (4.7)</b>   | <b>40.4 (3.9)</b>   | <b>41.4 (5.4)</b>   | <b>0.405</b> |
| <b>HbA1c</b><br>(mmol/mol)                             | <b>60.9 (17.1)</b>  | <b>63.0 (17.8)</b>  | <b>58.6 (16.4)</b>  | <b>0.339</b> |
| <b>BHB (mmol/L)</b>                                    | <b>0.2 (0.1)</b>    | <b>0.2 (0.1)</b>    | <b>0.2 (0.1)</b>    | <b>0.865</b> |
| <b>Creatinine</b><br>(μmol/L)                          | <b>88.2 (19.9)</b>  | <b>92.0 (19.9)</b>  | <b>84.4 (19.5)</b>  | <b>0.151</b> |
| <b>eGFR</b><br>(ml/min/1.73m <sup>2</sup> )            | <b>72.0 (19.2)</b>  | <b>67.7 (16.4)</b>  | <b>76.2 (21.0)</b>  | <b>0.254</b> |

**Abbreviations:** Med=Median; SD=Standard deviation; IQR=Interquartile range; CI=Confidence interval; NS=Not significant; BMI=body mass index; NYHA=New York Heart Association functional classification for heart failure; SBP= systolic blood pressure; DBP=Diastolic blood pressure; MAP=Mean arterial pressure; IHD=Ischemic heart disease; HR=Heart Rate; bpm=beats per minute; DCM=Dilated cardiomyopathy; AF=Atrial fibrillation; PAD=Peripheral arterial disease; TIA=Transient ischemic attack; MI=Myocardial infarction; ACE-

## SUPPLEMENTARY DATA

I=Angiotensin converting enzyme inhibitor; ARB=Angiotensin receptor blocker; MRA=Mineralocorticoid receptor antagonist; OHA=Oral hypoglycemic agent; LVEDV=Left ventricular end diastolic volume; LVESV=Left ventricular end systolic volume; LVEF=Left ventricular ejection fraction; LV=Left ventricular; Hb=Hemoglobin; Hct=Hematocrit; HbA1c=Hemoglobin A1c; eGFR=Estimated glomerular filtration rate; NT-proBNP=N-terminal pro B-type natriuretic peptide; hsCRP=High sensitivity C-reactive protein; Oxidized LDL=Oxidized low density lipoprotein; Na=Sodium; Alb=Albumin; ACR=Albumin:creatinine ratio; V02 Max=Peak oxygen consumption; VC02 Max=Peak carbon dioxide production; Ve=minute ventilation; Ve/VC02= peak minute ventilation to carbon dioxide ratio; SF-36 PCS=Physical component summary of the short form 36; SF-36 MCS=Mental component summary of the short form 36; MLHF=Minnesota living with heart failure.

\* Bumetanide dose converted to equivalent furosemide dose (1mg bumetanide = 40mg furosemide)

† = Unable to analyse baseline images of one participant in placebo group due to very poor image quality

†† = Unable to analyze baseline LA volume in 5 patients due to poor image quality (overall n= 51, dapagliflozin n=26, placebo n=25)

‡=Analysis excludes 2 patients in placebo arm who were unable to complete CPET
